# Supplementary material for: Heterochromatin and RNAi act independently to ensure genome stability in Mucorales human fungal pathogens
Source: PubMed Central journal article supplement — Proc Natl Acad Sci U S A. 2023 Feb 6;120(7):e2220475120. doi: 10.1073/pnas.2220475120 (PMC9963178; doi:10.1073/pnas.2220475120), 2023-02-06

**Dataset S3.** Major transposable element families and subfamilies, their ORFs, and protein domain configurations. The full-length, scaled nucleotide sequences of the major transposable element families and subfamilies identified in *M. lusitanicus* are depicted. Each family shows ORF prediction (gray arrowed blocks), as well as encoded InterPro protein domains (color-coded rectangles).

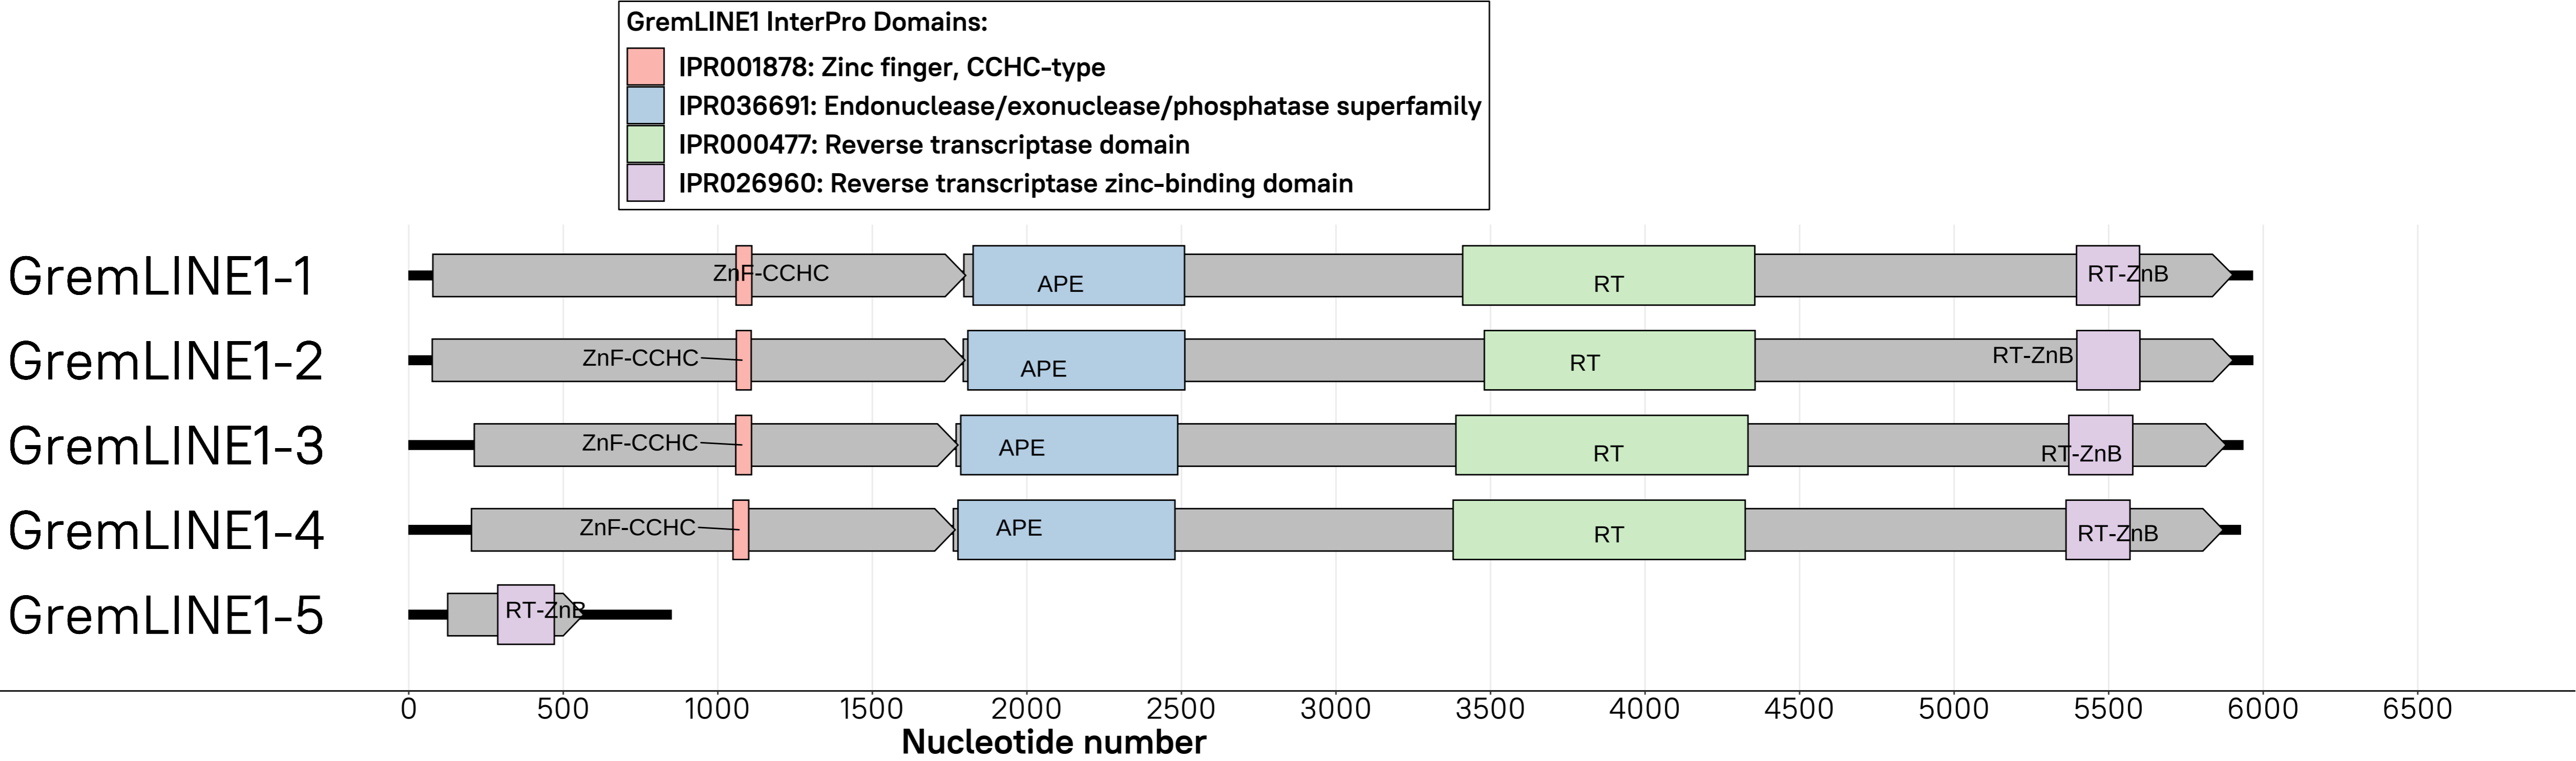

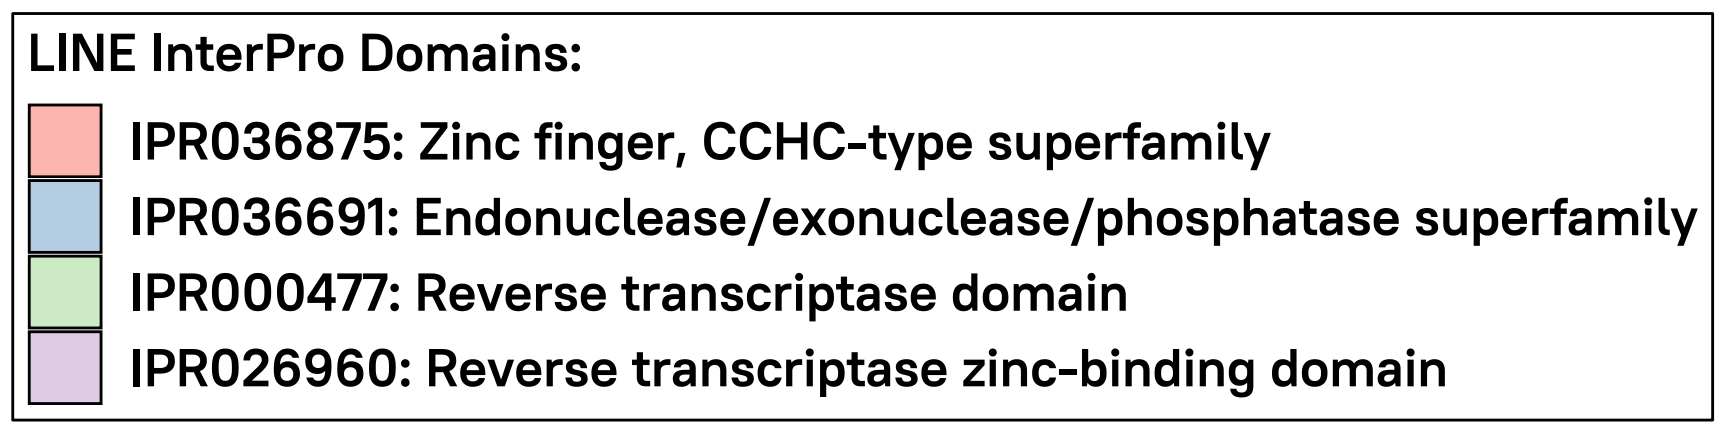

LINE-10  
 LINE-11  
 LINE-12  
 LINE-13  
 LINE-14  
 LINE-15  
 LINE-16  
 LINE-17  
 LINE-18  
 LINE-19  
 LINE-20  
 LINE-21  
 LINE-22  
 LINE-3  
 LINE-5.2  
 LINE-6  
 LINE-7  
 LINE-8  
 LINE-9  
 LINE\_L1-1  
 LINE\_L1-3  
 LINE\_L1-4.1  
 LINE\_L1-4.2

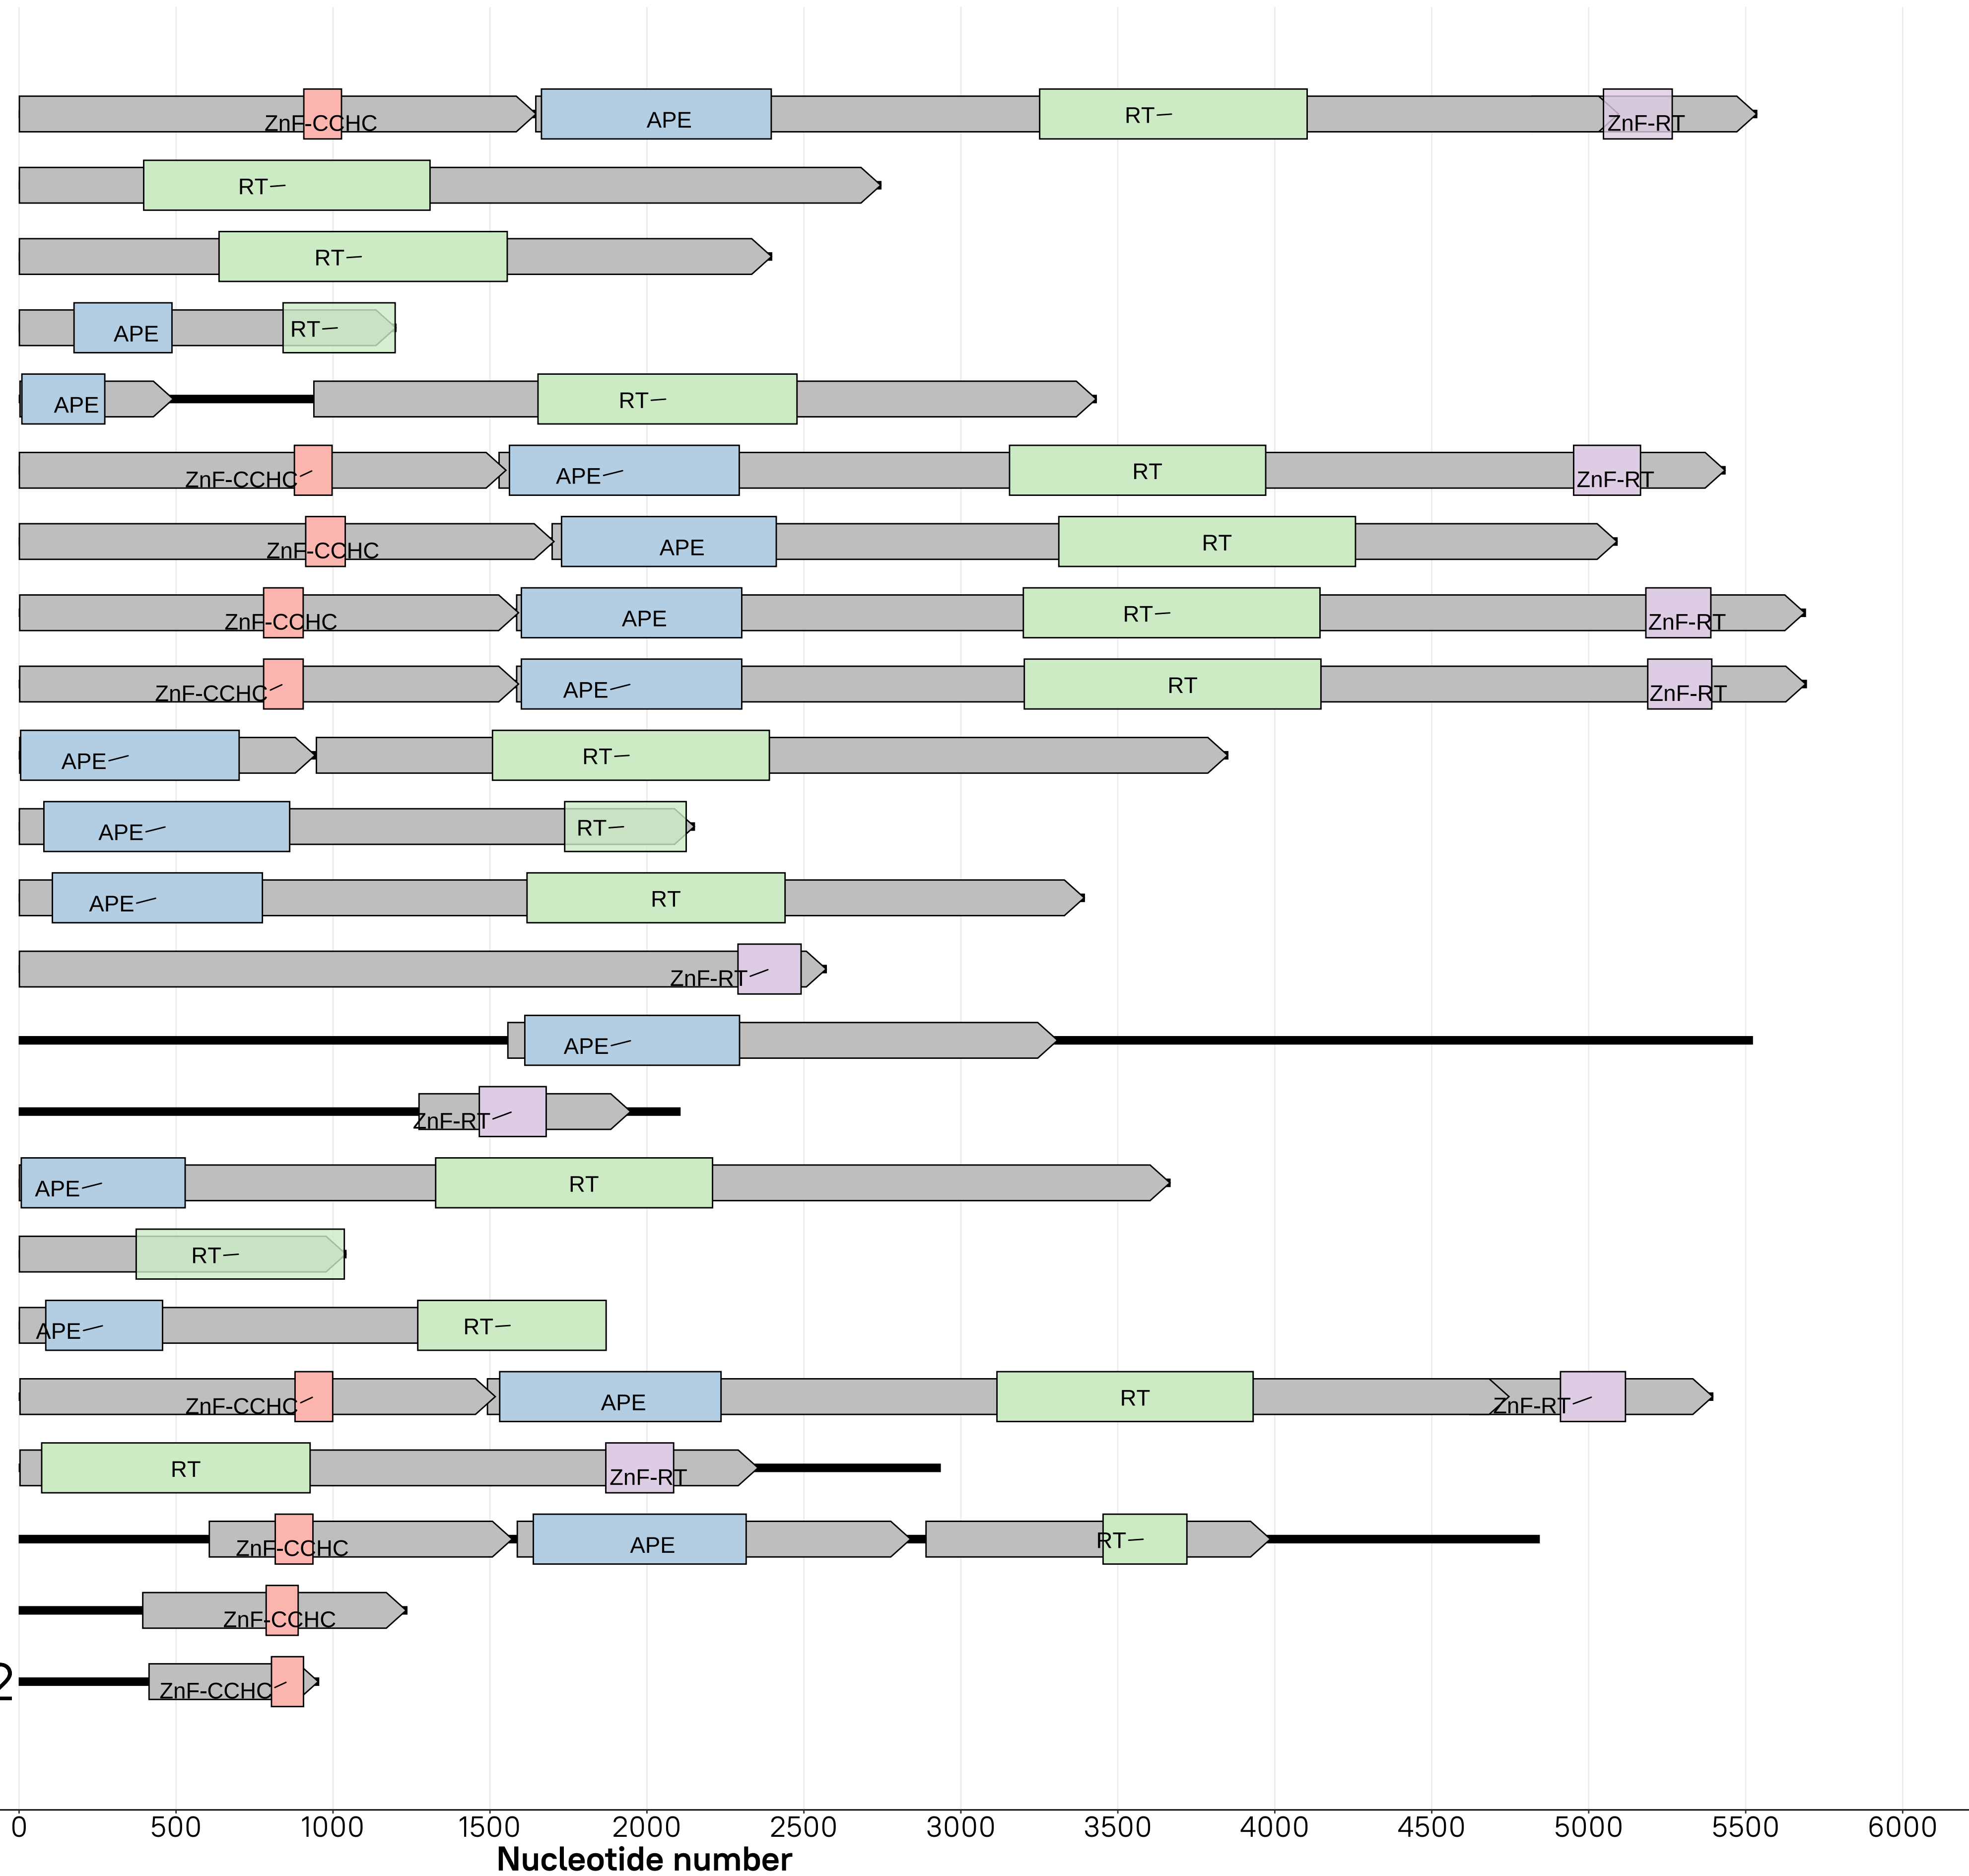

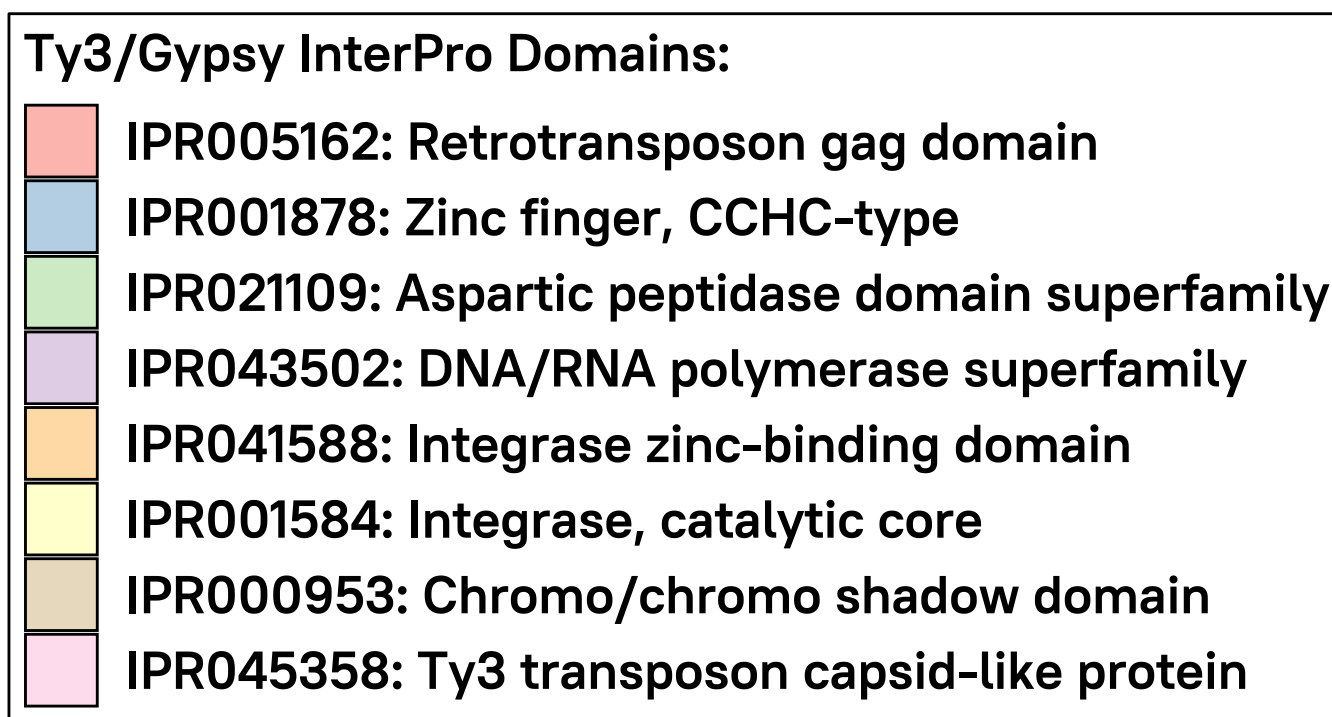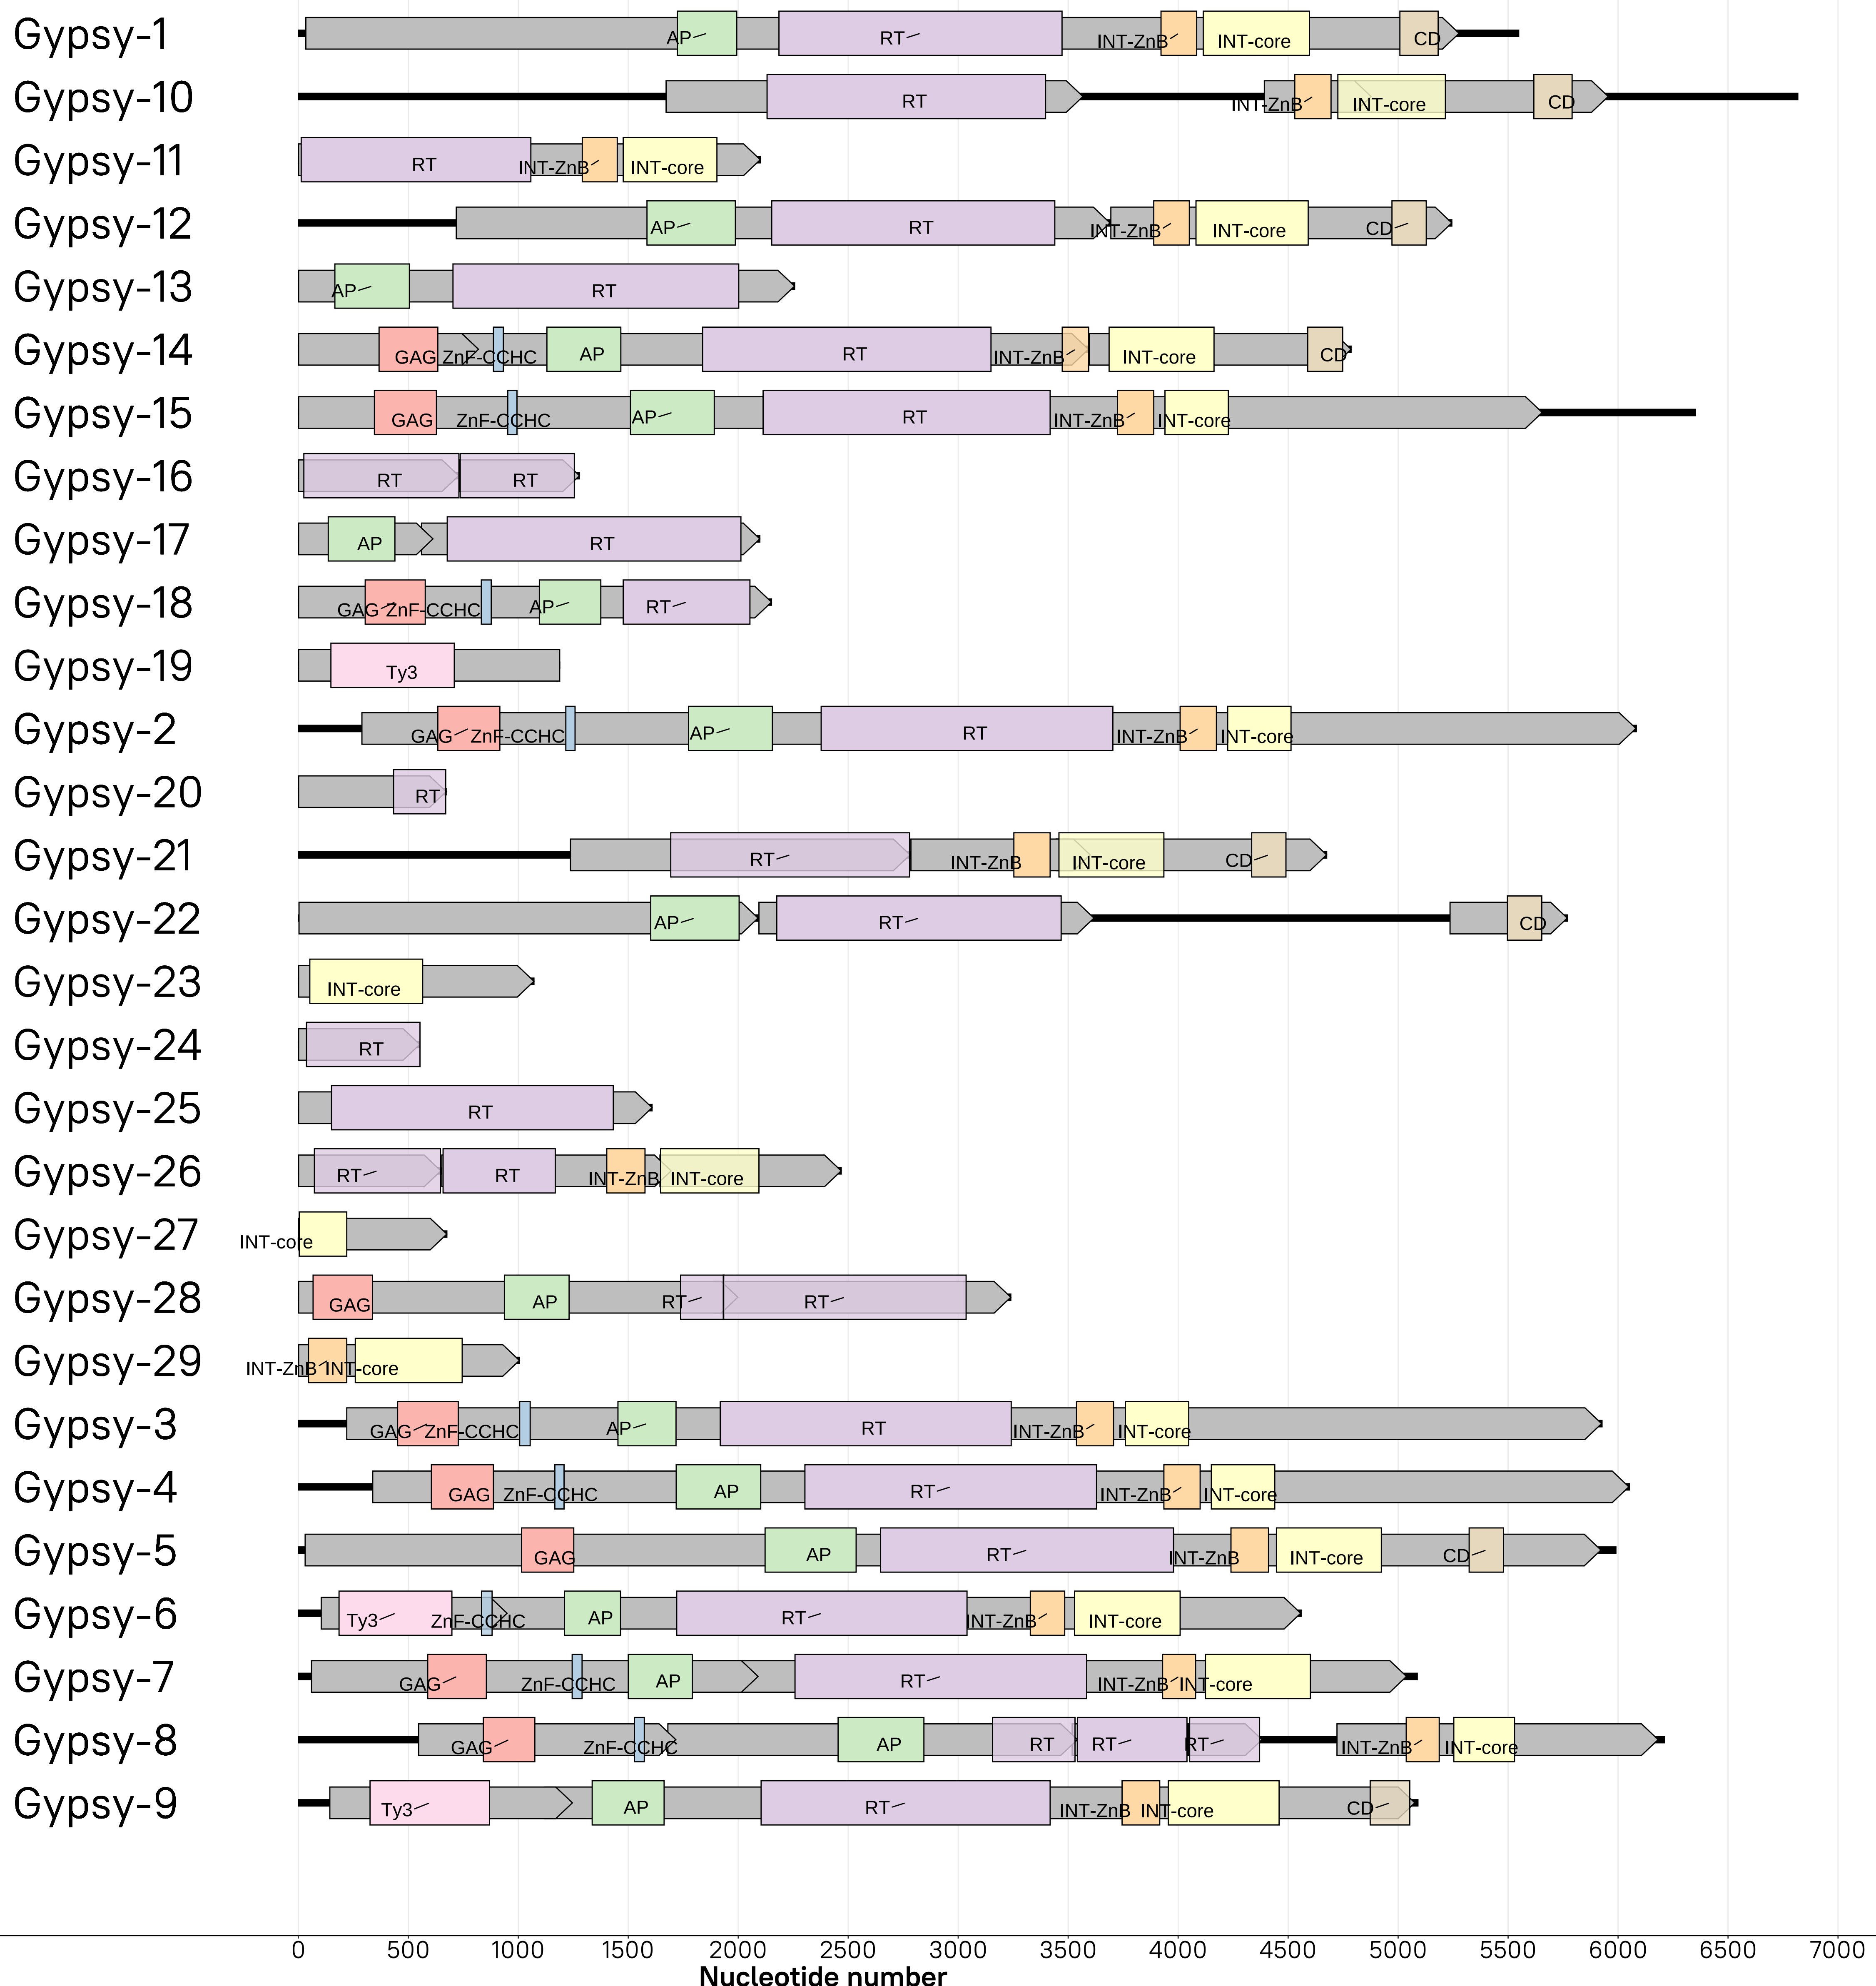

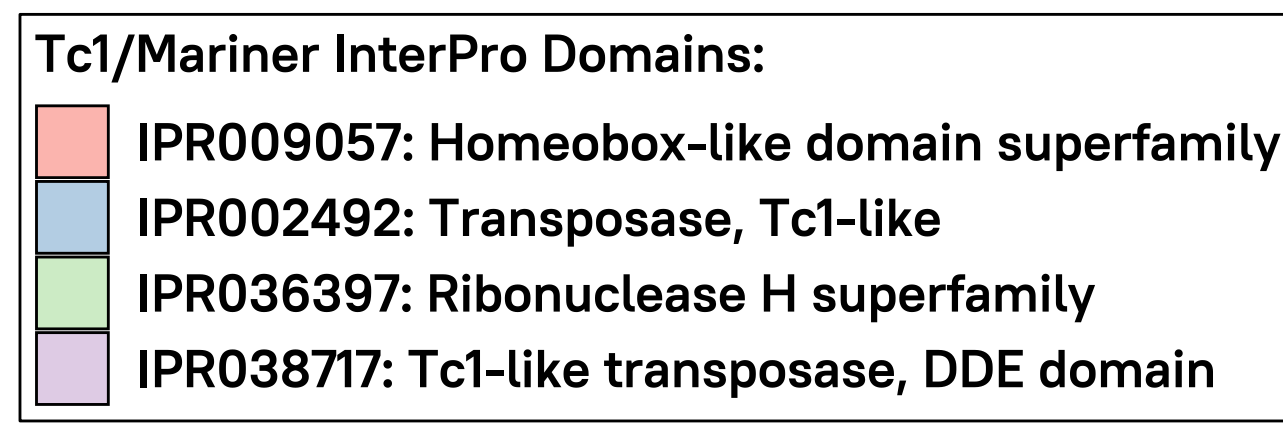

Tc1Mariner-1  
 Tc1Mariner-10  
 Tc1Mariner-11  
 Tc1Mariner-2  
 Tc1Mariner-3  
 Tc1Mariner-4  
 Tc1Mariner-5  
 Tc1Mariner-6  
 Tc1Mariner-7  
 Tc1Mariner-8  
 Tc1Mariner-9

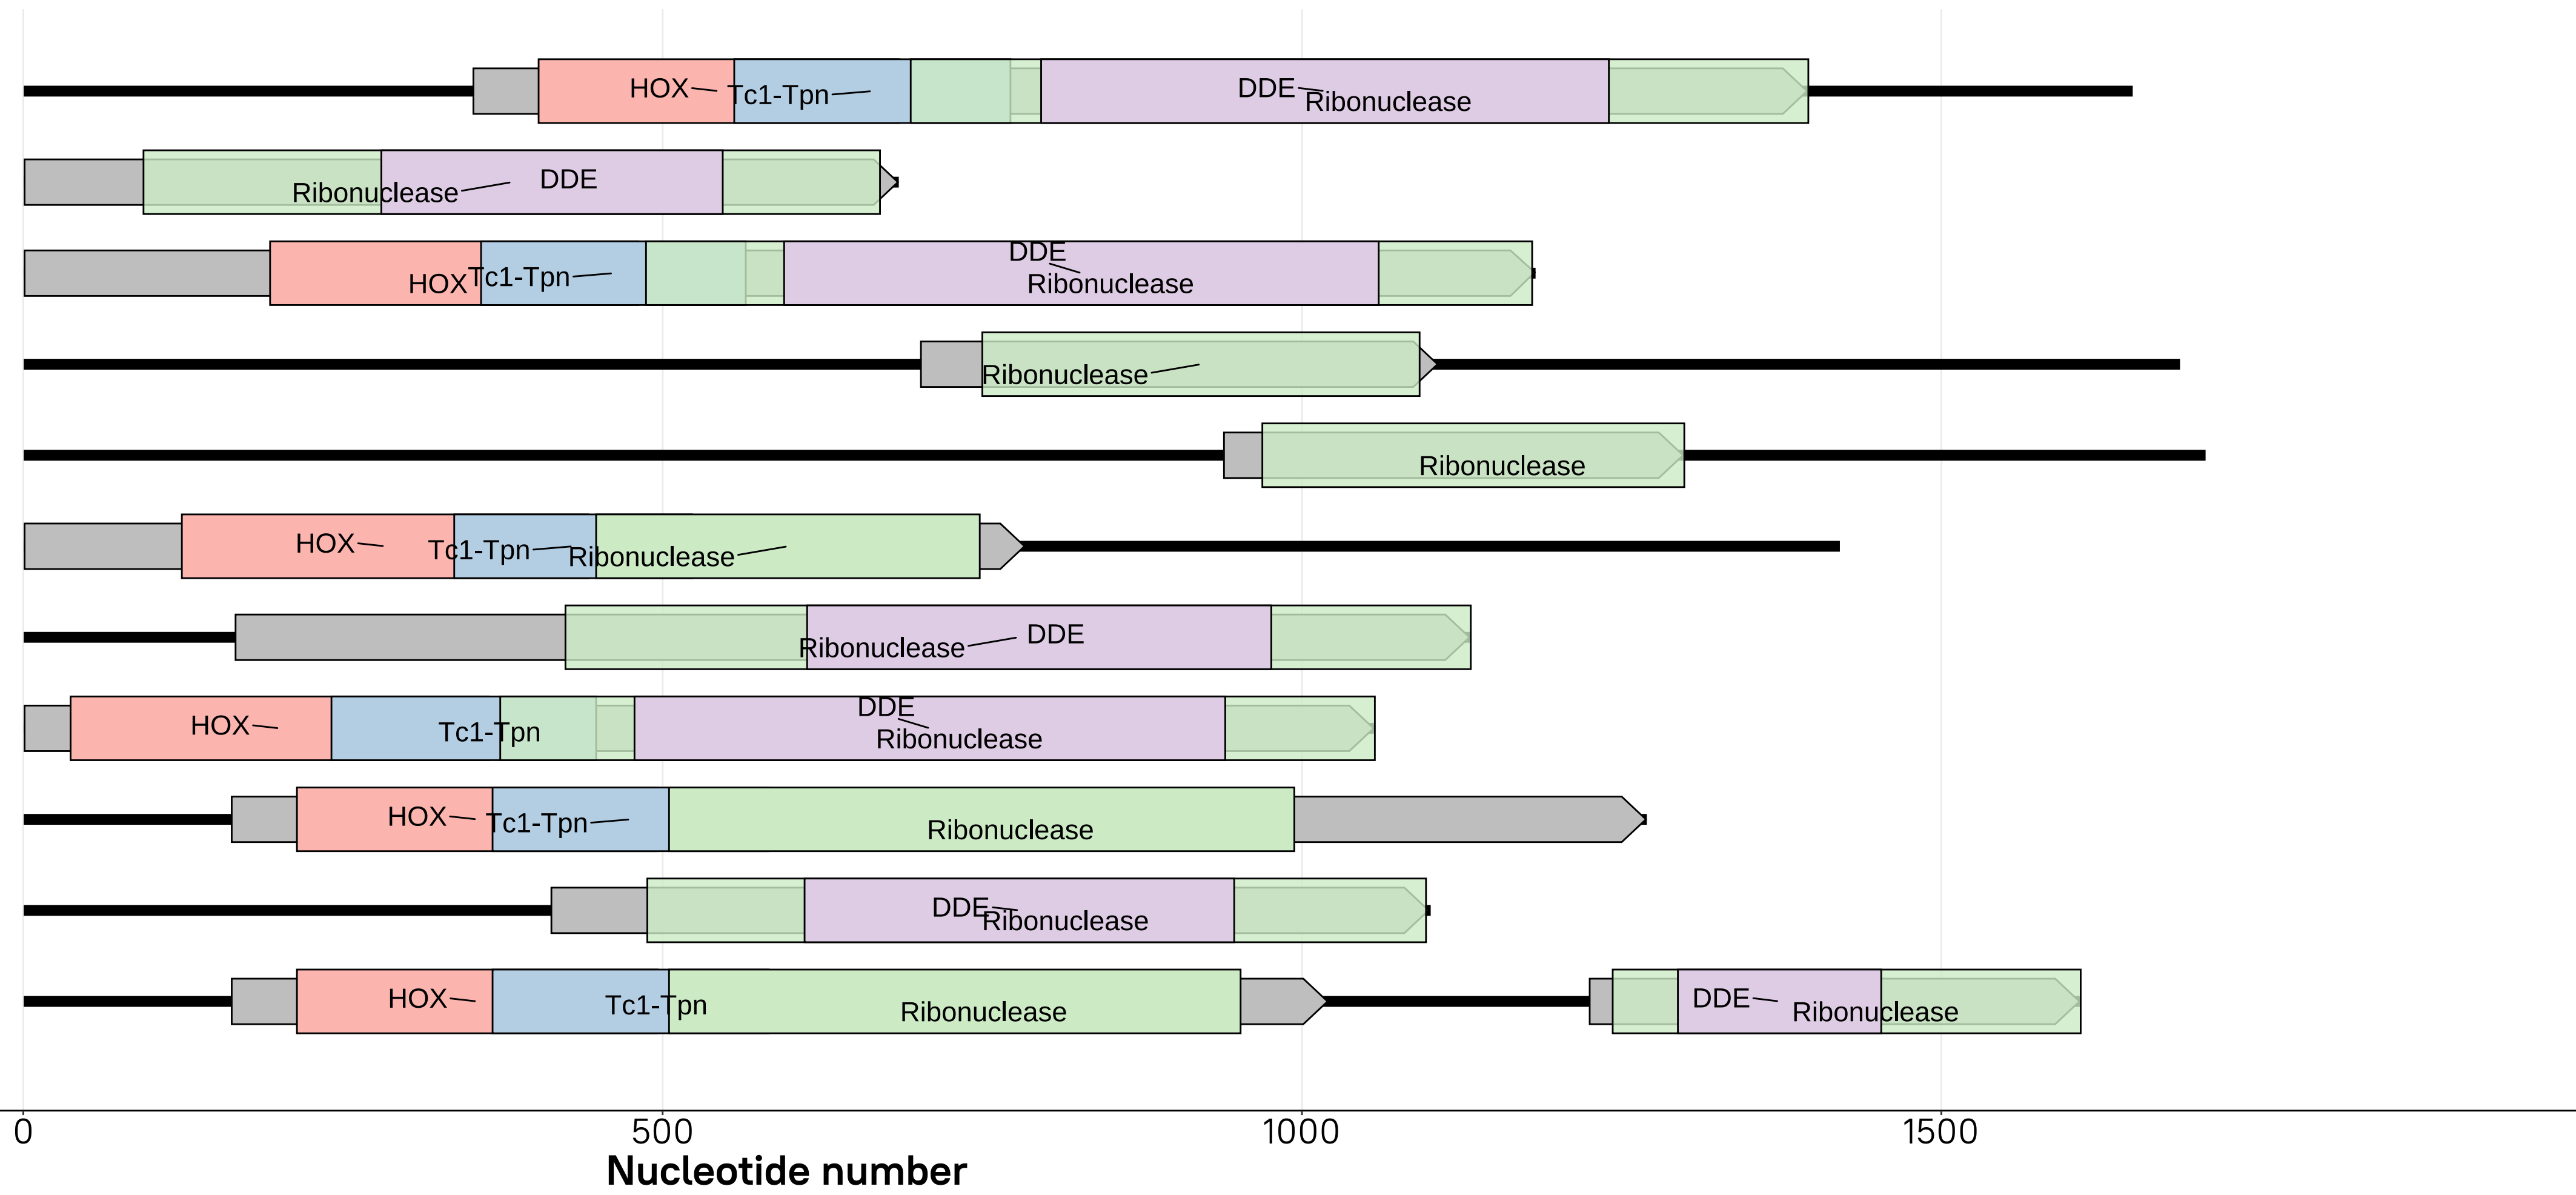

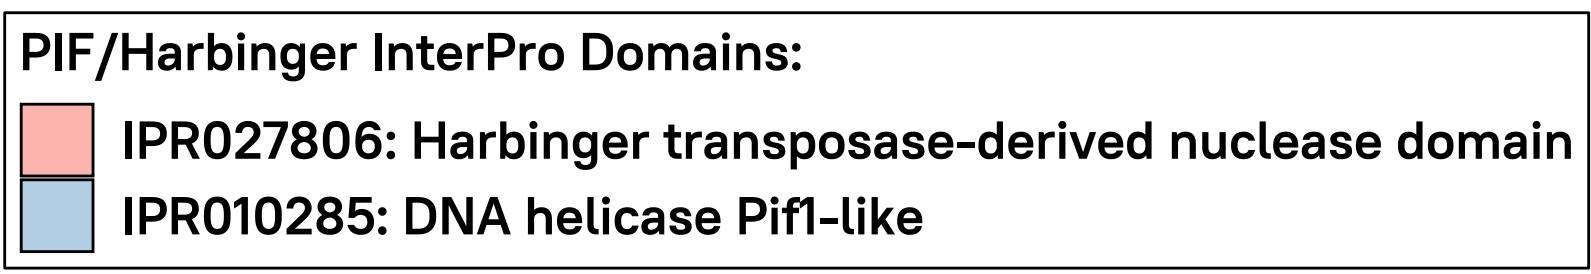

PIFharbinger-1  
 PIFharbinger-10  
 PIFharbinger-11  
 PIFharbinger-12  
 PIFharbinger-2  
 PIFharbinger-3  
 PIFharbinger-4  
 PIFharbinger-5  
 PIFharbinger-6  
 PIFharbinger-7  
 PIFharbinger-8

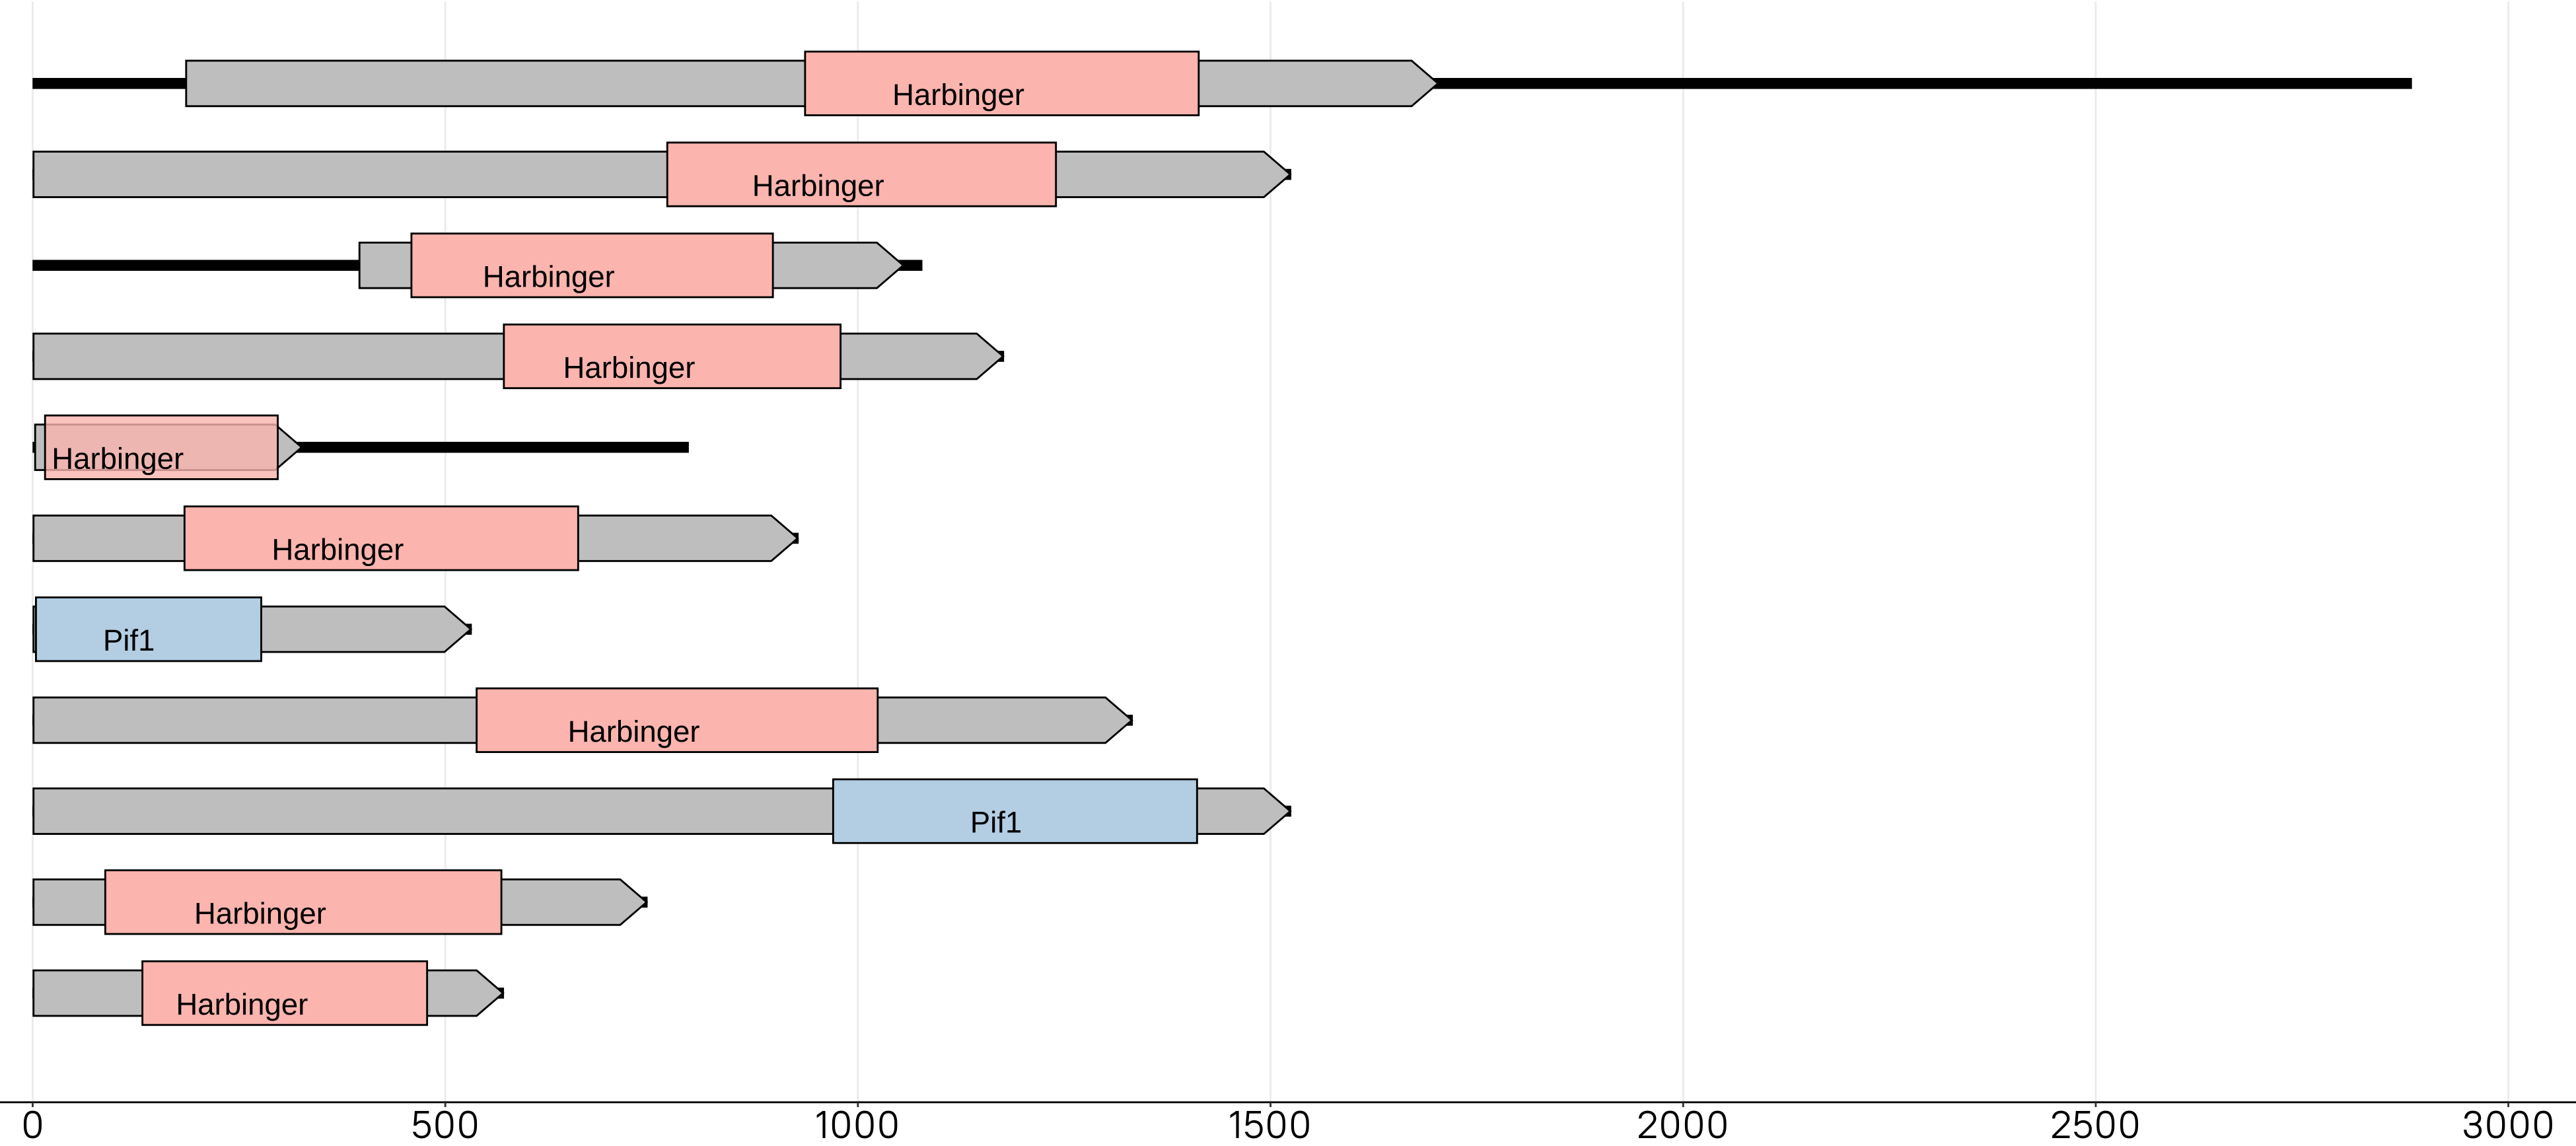

**Nucleotide number**

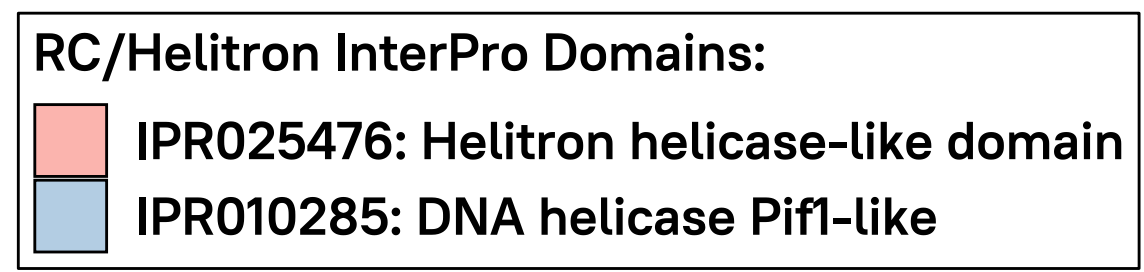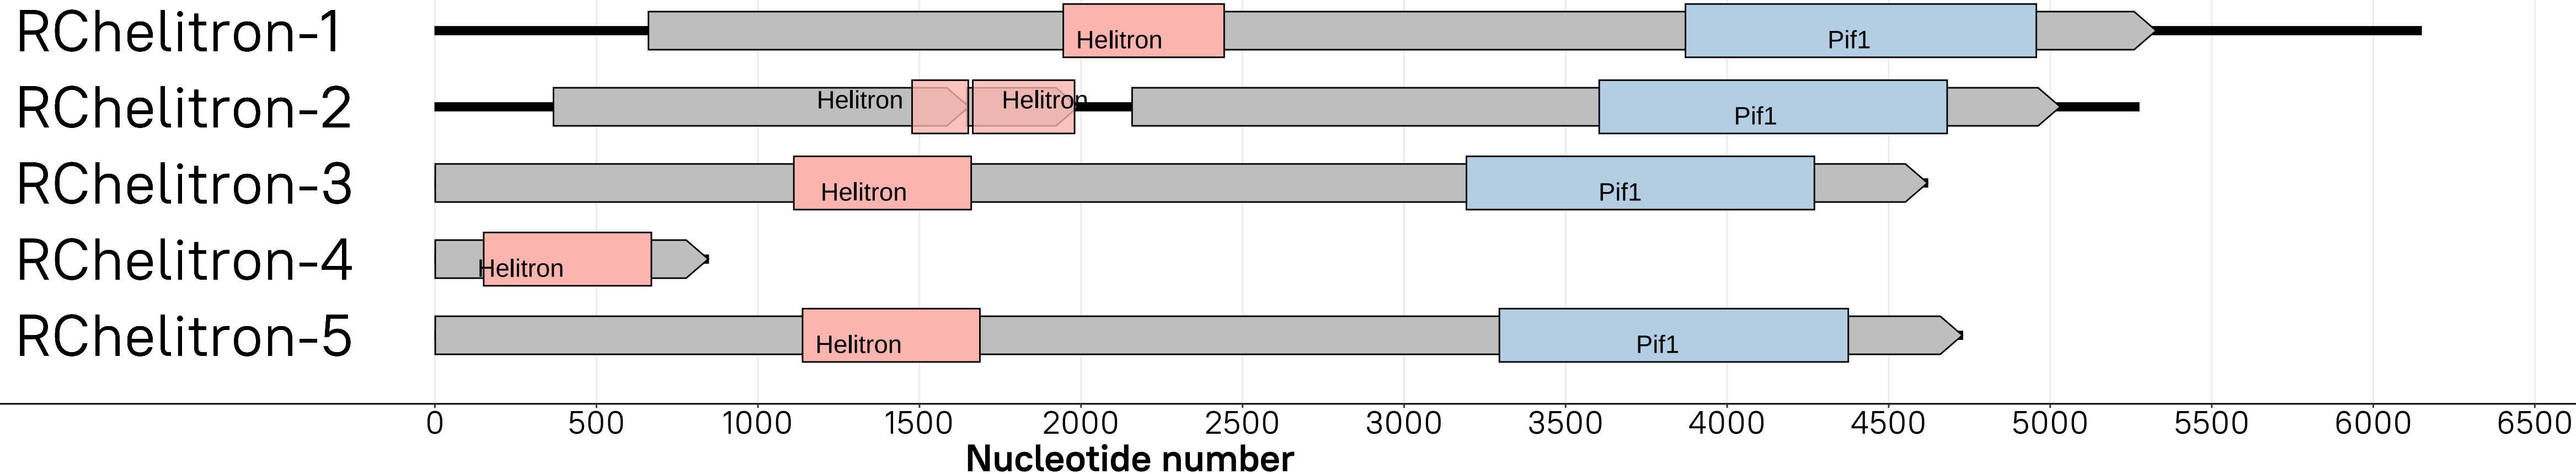

Supplement: pnas.2220475120.sd03.pdf [file pnas.2220475120.sd03.pdf]
